# Supplementary material
Source: publisher site journal article supplement (https://www.dovepress.com/article/569559)
Supplement: Supplementary file 1 [file Supplementary%20material.docx]

**Table S1** Missing Percentage

| **Variable** | **Missing Percentage (%)** |
| --- | --- |
| Age | 0 |
| Sex | 0 |
| BMI | 2.3 |
| WBC 103/uL | 3.43 |
| Hb g/dL | 3.43 |
| PLT 109 /L | 3.43 |
| BUN mg/dL | 9.44 |
| Creatinine mg/dL | 4.92 |
| Na mmol/L | 5.53 |
| K mmol/L | 5.12 |
| Body temperature (°C) | 1.43 |
| Heart rate / min | 1.41 |
| Respiratory rate / min | 1.47 |
| SBP mmHg | 1.45 |
| DBP mmHg | 1.45 |
| MBP mmHg | 1.45 |
| Echocardiographic parameters | 82.29 |
| ALT U/L | 25 |
| AST U/L | 15 |
| Total bilirubin mg/dL | 28 |
| Alb g/dL | 48 |

**Notes:** Missing percentage values indicate the proportion of cases with unavailable data for each variable used in model development.

**Abbreviations:** Alb, albumin; ALT, alanine aminotransferase; AST, aspartate aminotransferase; BMI, body mass index; BUN, blood urea nitrogen; Cre, serum creatinine; DBP, diastolic blood pressure; Hb, hemoglobin; K, serum potassium; MBP, mean blood pressure; Na, serum sodium; PLT, platelet count; SBP, systolic blood pressure; WBC, white blood cell count.

# Supplementary Material 1: Introduction of five predictive models

Five supervised learning algorithms were applied in this study to develop predictive models for in-hospital cardiac arrest: Logistic Regression, Decision Tree, Random Forest, XGBoost, and Multivariate Adaptive Regression Splines (MARS). The principles of each model are summarized below.

## Logistic Regression

Logistic regression is a well-established statistical approach widely used for classification tasks. Although it shares conceptual similarities with linear regression in modeling the relationship between dependent and independent variables, logistic regression differs in that the dependent variable is categorical rather than continuous. This characteristic makes it particularly suitable for binary classification problems, such as distinguishing between the presence or absence of a condition-an approach conceptually related to discriminant analysis.

In medical research, logistic regression is commonly applied to estimate disease probabilities and examine associations between risk factors and clinical outcomes. In the field of machine learning, it also serves as a fundamental baseline model for classification, providing a reference point for evaluating the performance of more advanced algorithms.

## Decision Tree

Decision trees are supervised learning models that use a hierarchical, tree-like structure to perform both classification and regression tasks. When the target variable is continuous, the model functions as a regression tree; when it is categorical, it is referred to as a classification tree. A decision tree is constructed through a process of recursive binary splitting, starting from a root node that represents the initial decision point. From there, branches extend to leaf nodes, with each branch corresponding to a specific decision rule and each leaf node representing a final outcome. This hierarchical design mirrors the sequential, rule-based decision-making process characteristic of the model.

## Random Forest

Random Forest is an ensemble learning method developed to enhance the predictive performance and stability of decision trees. By constructing a large number of individual trees and introducing randomization during both data sampling and feature selection, Random Forest effectively mitigates the high variance commonly associated with single decision trees. The ensemble then aggregates the predictions of individual trees-typically through majority voting in classification tasks or averaging in regression tasks-to produce a more robust and accurate overall prediction.

The Random Forest algorithm employs the bootstrap aggregating (Bagging) technique, whereby multiple training datasets are generated from random samples drawn with replacement. Approximately 40% of the original data, known as the Out-of-Bag (OOB) subset, is excluded from each bootstrap sample. This OOB data is used both to estimate the model’s generalization error and to assess the relative importance of each feature, providing valuable insights into the contribution of predictors within the model.

## XGBoost

XGBoost (eXtreme Gradient Boosting) is an advanced implementation of the gradient boosting framework designed to optimize both computational efficiency and predictive performance. As an ensemble learning method, it integrates multiple weak learners-typically decision trees-into a strong predictive model through iterative boosting. XGBoost is distinguished by its efficiency, scalability, and flexibility, incorporating features such as parallel processing, automated handling of missing data, and regularization techniques that help prevent overfitting. These characteristics make it highly effective for both classification and regression tasks across a wide range of applications.

XGBoost has gained broad recognition for its outstanding performance in structured data analysis, consistently achieving state-of-the-art results in machine learning benchmarks and competitions. Its versatility has led to successful applications in fields such as healthcare, finance, and marketing, where it has been employed for tasks including disease risk prediction, fraud detection, and customer segmentation.

## MARS

Multivariate Adaptive Regression Splines (MARS) is a nonlinear regression technique that extends traditional spline regression through a flexible and adaptive modeling approach. MARS constructs predictive models using multiple piecewise linear segments, or splines, each characterized by distinct slopes. The algorithm partitions the data space into regions by treating each observation as a potential “knot,” enabling localized linear relationships to be fitted iteratively within each segment.

The MARS modeling process consists of two main stages. In the forward selection phase, the algorithm generates a comprehensive set of candidate basis functions and their corresponding knots by progressively adding terms that improve model fit. This is followed by a backward elimination phase, which prunes less significant terms to prevent overfitting and identify the most informative predictors. Through this iterative process, MARS achieves an optimal balance between model complexity and predictive accuracy.
